# Supplementary material for: Inhibition of the Smc5/6 Complex during Meiosis Perturbs Joint Molecule Formation and Resolution without Significantly Changing Crossover or Non-crossover Levels
Source: PubMed Central journal article supplement (PMC3820751; doi:10.1371/journal.pgen.1003898), 2013-11-07
Supplement: pgen.1003898.s010.pdf [file pgen.1003898.s010.pdf]

| Strain        | Genotype                                                                                                                                                                                                                       | Origin     |
|---------------|--------------------------------------------------------------------------------------------------------------------------------------------------------------------------------------------------------------------------------|------------|
| CB1017        | <i>ho::LYS2, lys2, ura3, leu2::hisG, his3::hisG, trp1::hisG</i>                                                                                                                                                                | K8379      |
| <b>Strain</b> | <b>Additions to CB1017 genotype</b>                                                                                                                                                                                            |            |
| CB46          | <i>REC8-3HA-URA3</i>                                                                                                                                                                                                           | This study |
| CB58          | <i>rad50-K181-URA3</i>                                                                                                                                                                                                         | NKY1002    |
| CB319         | <i>SMC6-13Myc-kanMX</i>                                                                                                                                                                                                        | This study |
| CB1032        | <i>smc6-56</i>                                                                                                                                                                                                                 | This study |
| CB1181        | <i>SMC6-6HIS-3xFlag-kanMX</i>                                                                                                                                                                                                  | This study |
| CB1183        | <i>arg4-Bgl2/arg4-Nsp, his4B::LEU2-MluI/his4xLEU2-MluI::BamHI-URA3</i>                                                                                                                                                         | This study |
| CB1197        | <i>promURA3::tetR::GFP-LEU2, tetOx224-URA3, heterozygous CenV-GFP</i>                                                                                                                                                          | This study |
| CB1248        | <i>smc6-56, promURA3::tetR::GFP-LEU2, tetOx224-URA3, heterozygous CenV-GFP</i>                                                                                                                                                 | This study |
| CB1301        | <i>smc6-56, spo11::hphMX</i>                                                                                                                                                                                                   | This study |
| CB1302        | <i>spo11::hphMX</i>                                                                                                                                                                                                            | This study |
| CB1303        | <i>smc6-56, arg4-Bgl2/arg4-Nsp, his4B::LEU2-MluI/his4xLEU2-MluI::BamHI-URA3</i>                                                                                                                                                | This study |
| CB1346        | <i>ScREC8-3HA-URA3, smc6-56</i>                                                                                                                                                                                                | This study |
| CB1360        | <i>smc6-56, rad50-K181-URA3</i>                                                                                                                                                                                                | This study |
| CB1361        | <i>REC8-3HA-URA3, SMC6-13Myc-kanMX</i>                                                                                                                                                                                         | This study |
| CB1411        | <i>rec8::kanMX, SMC6-13Myc-kanMX</i>                                                                                                                                                                                           | This study |
| CB1426        | <i>smc6-56, pURA3-TetR-GFP-LEU2, Bmh1::tetOx224-URA3, heterozygous TelV-GFP</i>                                                                                                                                                | This study |
| CB1427        | <i>pURA3-TetR-GFP-LEU2, Bmh1::tetOx224-URA3, heterozygous TelV-GFP</i>                                                                                                                                                         | This study |
| CB1430        | <i>SMC6-6HIS-3xFlag-kanMX, rec8::URA3</i>                                                                                                                                                                                      | This study |
| CB1465        | <i>smc6-56, spo11::URA3, spo13::hisG</i>                                                                                                                                                                                       | This study |
| CB1466        | <i>spo11::URA3, spo13::hisG</i>                                                                                                                                                                                                | This study |
| CB1510        | <i>kanMX-pCLB2-3HA-NSE4</i>                                                                                                                                                                                                    | This study |
| CB1511        | <i>kanMX-pCLB2-3HA-NSE4, spo11::hphMX</i>                                                                                                                                                                                      | This study |
| CB1723        | <i>smc6-56, pGAL-NDT80-TRP1, ura3::pGPD1-GAL4(848).ER::URA3</i>                                                                                                                                                                | This study |
| CB1753        | <i>pGAL-NDT80-TRP1, ura3::pGPD1-GAL4(848).ER::URA3</i>                                                                                                                                                                         | This study |
| CB1754        | <i>kanMX-pCLB2-3HA-SMC5, spo11::hphMX</i>                                                                                                                                                                                      | This study |
| CB1872        | <i>kanMX-pCLB2-3HA-SMC5</i>                                                                                                                                                                                                    | This study |
| CB2053        | <i>kanMX-pCLB2-3HA-NSE2</i>                                                                                                                                                                                                    | This study |
| CB2067        | <i>kanMX-pCLB2-3HA-NSE2, spo11::hphMX</i>                                                                                                                                                                                      | This study |
| CB2059        | <i>rad50-K181-URA3, his4xLEU2-MluI::BamHI-URA3/his4B::LEU2-MluI, arg4-Nsp/arg4-Bgl2,</i>                                                                                                                                       | This study |
| CB2060        | <i>smc6-56, rad50-K181-URA3, his4xLEU2-MluI::BamHI-URA3/his4B::LEU2-MluI, arg4-Nsp/arg4-Bgl2</i>                                                                                                                               | This study |
| CB2096        | <i>arg4del(eco47III-hpa1), leu-R/leu2-RV::URA3-(SmaI-Eco47III)-[ARG4cloned], HIS4/his4del(SalI-ClaI)::URA3-del(SmaI-Eco47III)-arg4-EcPal(1691), cyh2-z, ura3, pGAL-NDT80-TRP1, ura3::pGPD1-GAL4(848).ER::URA3</i>              | This study |
| CB2097        | <i>smc6-56, arg4del(eco47III-hpa1), leu-R/leu2-RV::URA3-(SmaI-Eco47III)-[ARG4cloned], HIS4/his4del(SalI-ClaI)::URA3-del(SmaI-Eco47III)-arg4-EcPal(1691), cyh2-z, ura3, pGAL-NDT80-TRP1, ura3::pGPD1-GAL4(848).ER::URA3</i>     | This study |
| CB2272        | <i>hop1::natMX, arg4del(eco47III-hpa1), leu-R/leu2-RV::URA3-(SmaI-Eco47III)-[ARG4cloned], HIS4/his4del(SalI-ClaI)::URA3-del(SmaI-Eco47III)-arg4-EcPal(1691), cyh2-z, ura3, pGAL-NDT80-TRP1, ura3::pGPD1-GAL4(848).ER::URA3</i> | This study |

Table S1
